# Supplementary material for: Cyclic Dipeptides Mediating Quorum Sensing and Their Biological Effects in Hypsizygus Marmoreus
Source: MDPI journal article supplement (doi:10.3390/biom10020298), 2020-02-13
Supplement: s1 [file s1]

# Supporting Information

## Cyclic Dipeptides Mediating Quorum Sensing and Their Biological Effects in *Hypsizygus* *Marmoreus*

Shu-Jing Sun <sup>1,\*†</sup>, Yun-Chao Liu <sup>1†</sup>, Cai-Hong Weng <sup>2†</sup>, Shi-Wei Sun <sup>2</sup>, Fan Li <sup>1</sup>, Hui Li <sup>2</sup> and Hu Zhu <sup>3,\*</sup>

<sup>1</sup> College of Life Sciences, Fujian Agriculture and Forestry University, Fuzhou 350002, People's Republic of China; yunfng0033@126.com (Y.-C.L.); fanli2020@126.com (F.L.)

<sup>2</sup> Centre for Bioengineering and Biotechnology, China University of Petroleum (East China), 66 Changjiang West Road, Qingdao 266580, People's Republic of China; chweng@ipe.ac.cn (C.-H.W.); [sunshiwei\\_1986@163.com](mailto:sunshiwei_1986@163.com) (S.-W.S.); [lihui@upc.edu.cn](mailto:lihui@upc.edu.cn) (H.L.)

<sup>3</sup> Fujian Provincial University Engineering Research Center of Industrial Biocatalysis, College of Chemistry and Materials Science, Fujian Normal University, 32 Shangsang Road, Fuzhou 350007, People's Republic of China

\* Correspondence: shjsun2004@126.com (S.-J.S.); zhuhu@fjnu.edu.cn (H.Z.); Tel.: +86-591-83-789-492 (S.-J.S.); +86-591-83-465-326 (H.Z.)

**Short title:** Cyclic dipeptides and their functions.

**Table S1.** NMR data of compound 4.

| Carbon Atom Number | $\delta_C$ | $\delta_H$                           |
|--------------------|------------|--------------------------------------|
| 1                  | 165.05     |                                      |
| 3                  | 45.47      | 3.58-3.62(2H, m)                     |
| 4                  | 22.56      | 1.91-2.04(2H, m)                     |
| 5                  | 28.36      | 2.01-2.04(1H, m)<br>2.33-2.35(1H, m) |
| 6                  | 59.14      | 4.09(1H, t)                          |
| 7                  | 169.37     |                                      |
| NH                 |            | 5.59(s)                              |
| 9                  | 56.18      | 4.28(1H, dd)<br>2.78(1H, dd)         |
| 10                 | 36.79      | 3.62-3.66(1H, m)                     |
| 1'                 | 135.93     | 7.22-7.36(5H, m)                     |
| 2'                 | 129.29     |                                      |
| 3'                 | 129.10     |                                      |
| 4'                 | 127.57     |                                      |

**Table S2.** NMR data of compound 1.

| Carbon Atom Number | $\delta_C$ | $\delta_H$     |
|--------------------|------------|----------------|
| 1                  | 165.54     |                |
| 3                  | 44.99      | 3.25m<br>2.93m |
| 4                  | 22.30      | 1.70m          |
| 5                  | 28.28      | 2.0m<br>1.40m  |
| 6                  | 58.84      | 4.03t          |
| 7                  | 169.35     |                |
| 9                  | 56.46      | 4.23t          |
| 10                 | 35.16      | 3.40m<br>2.93m |
| 1'                 | 127.51     |                |
| 2'                 | 131.25     | 7.04d          |
| 3'                 | 115.22     | 6.62d          |
| 4'                 | 156.34     |                |
| 5'                 | 115.22     | 6.62d          |
| 6'                 | 131.25     | 7.04d          |
| 4' -OH             |            | 9.17           |
| 8-NH               |            | 7.85           |

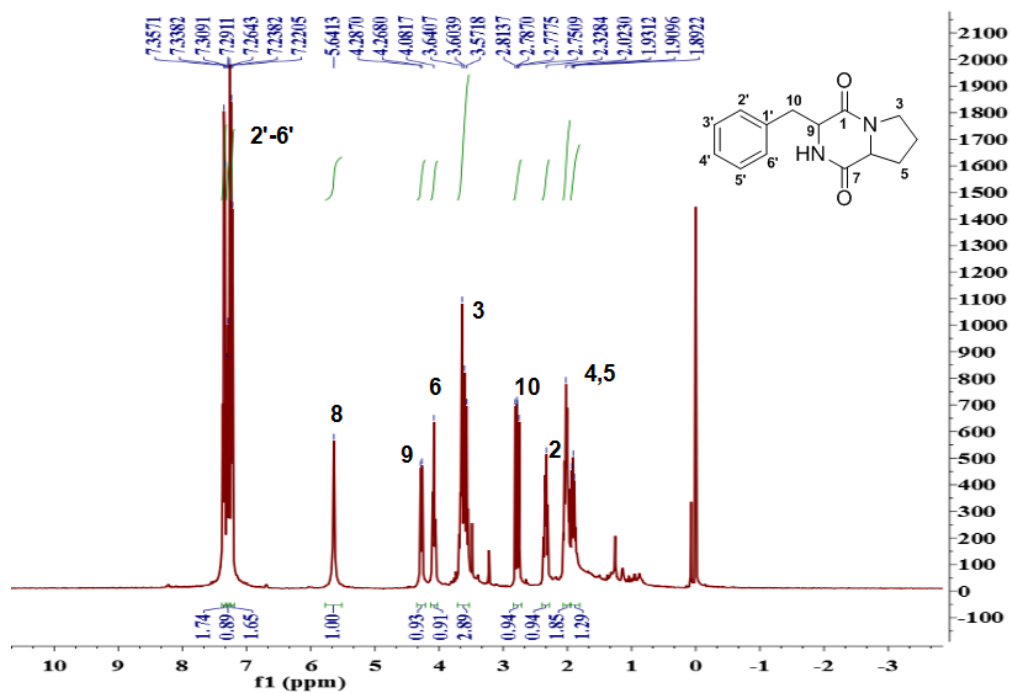

Figure S1.  $^1\text{H}$  NMR spectra of compound 4.

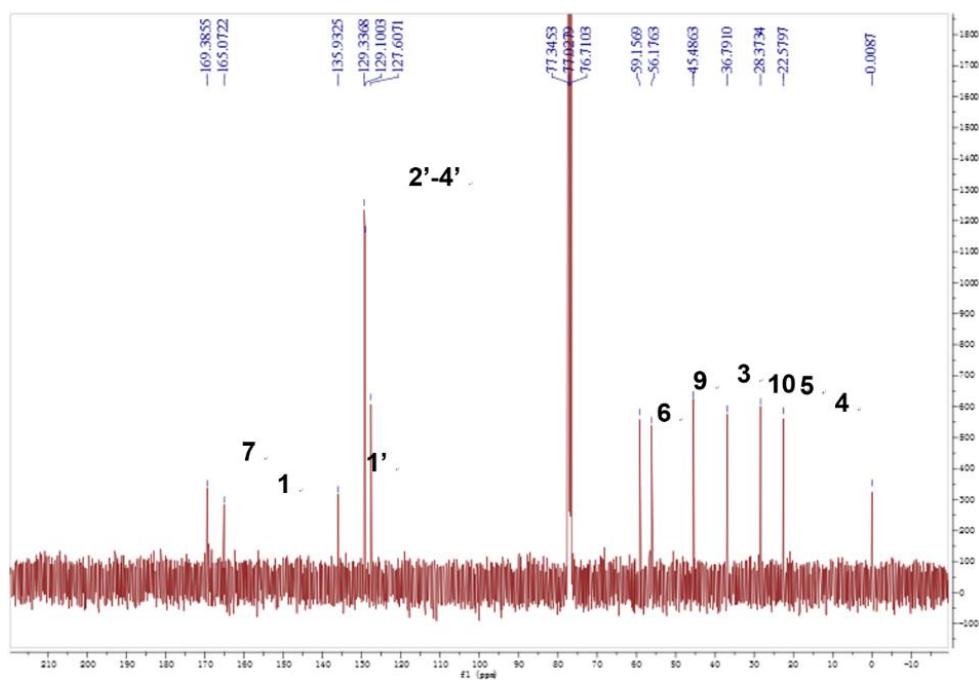

Figure S2.  $^{13}\text{C}$  NMR spectra of compound 4.

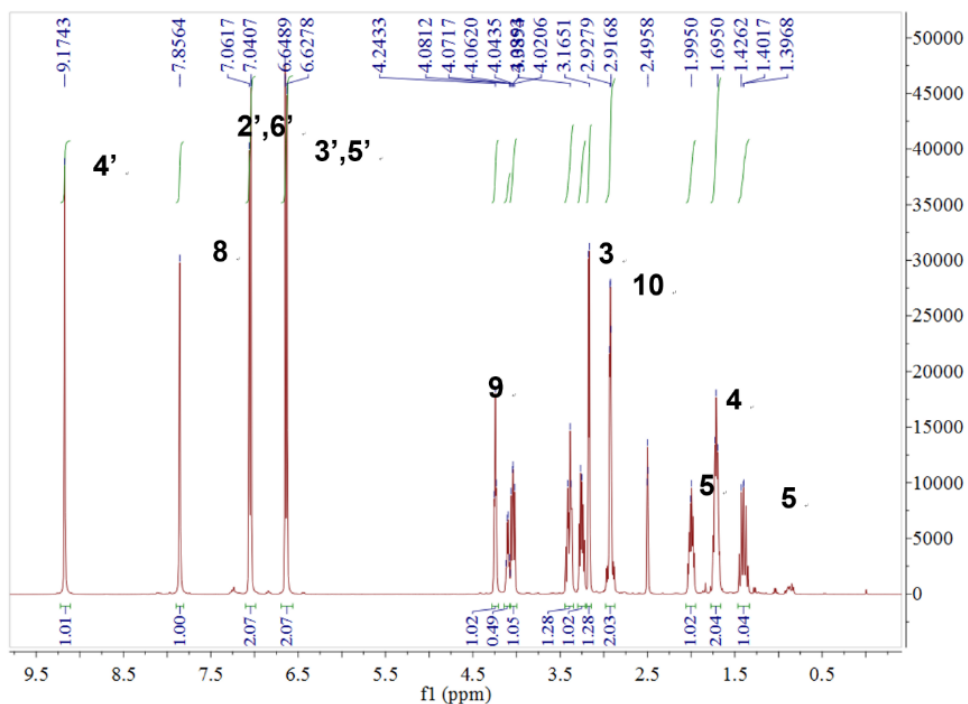

Figure S3.  $^1\text{H}$  NMR spectra of compound 1.

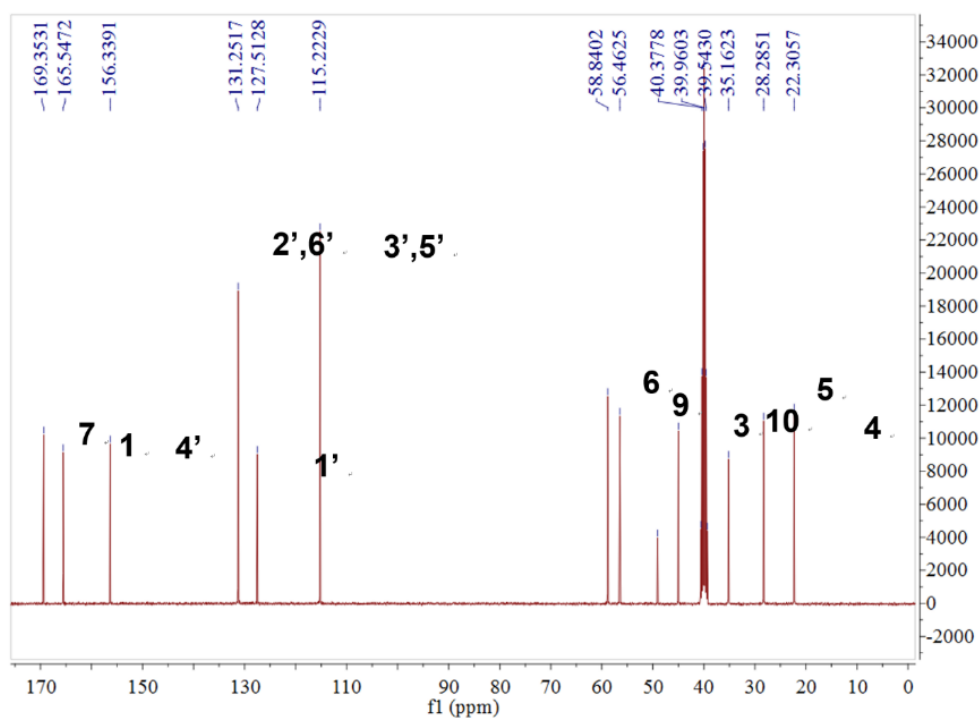

Figure S4.  $^{13}\text{C}$  NMR spectra of compound 1.

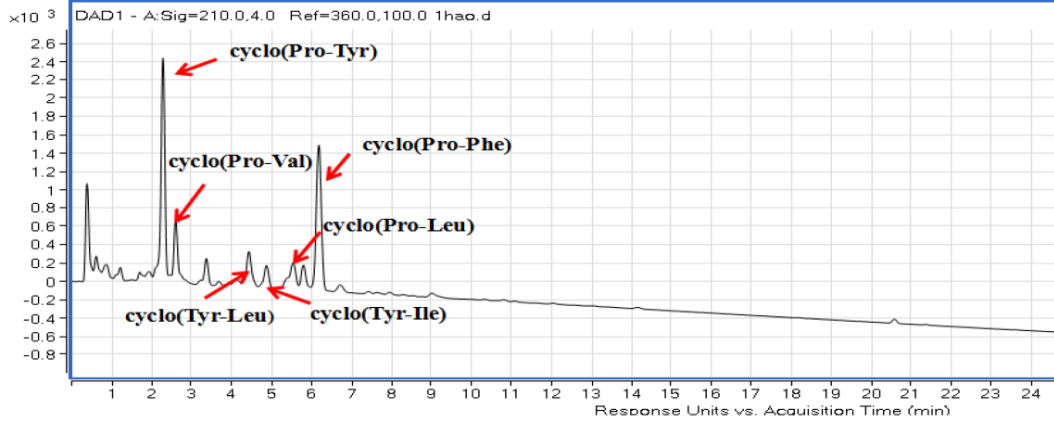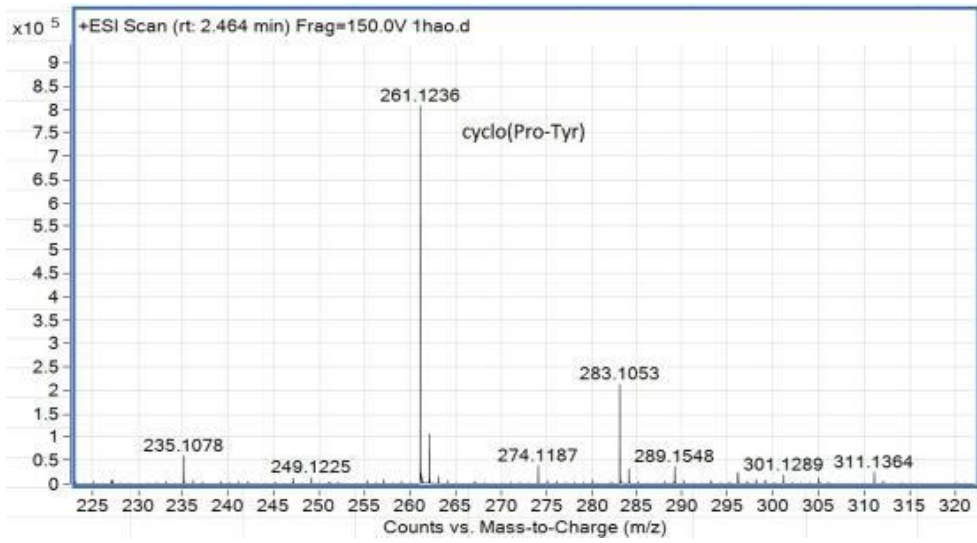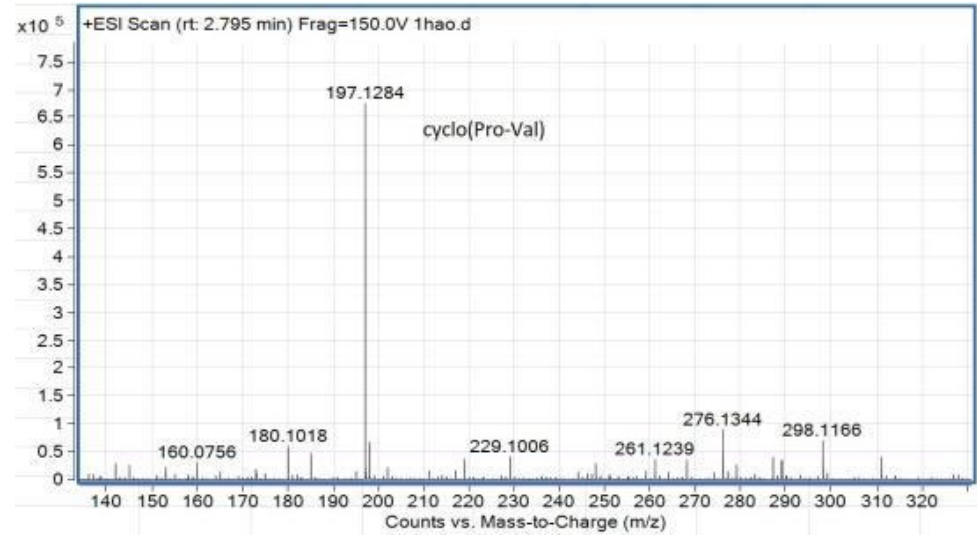

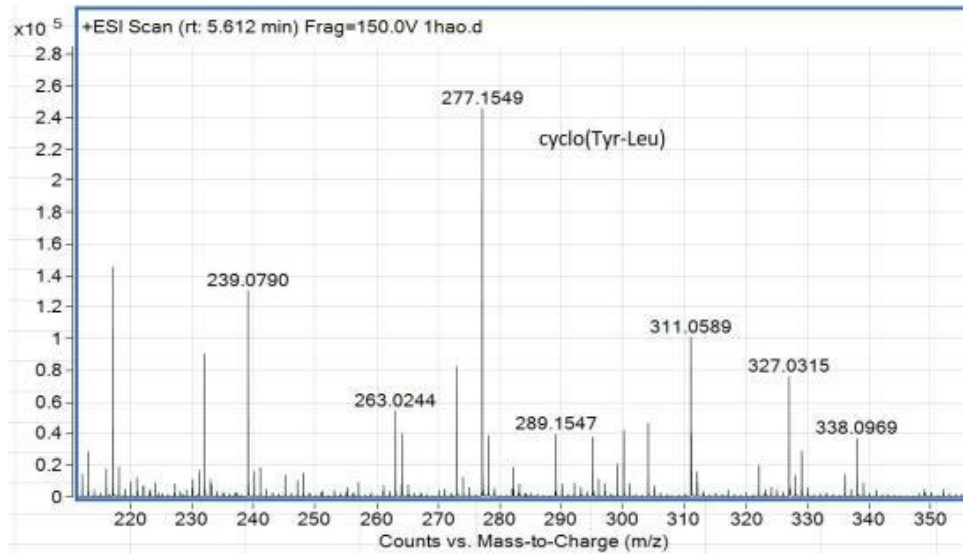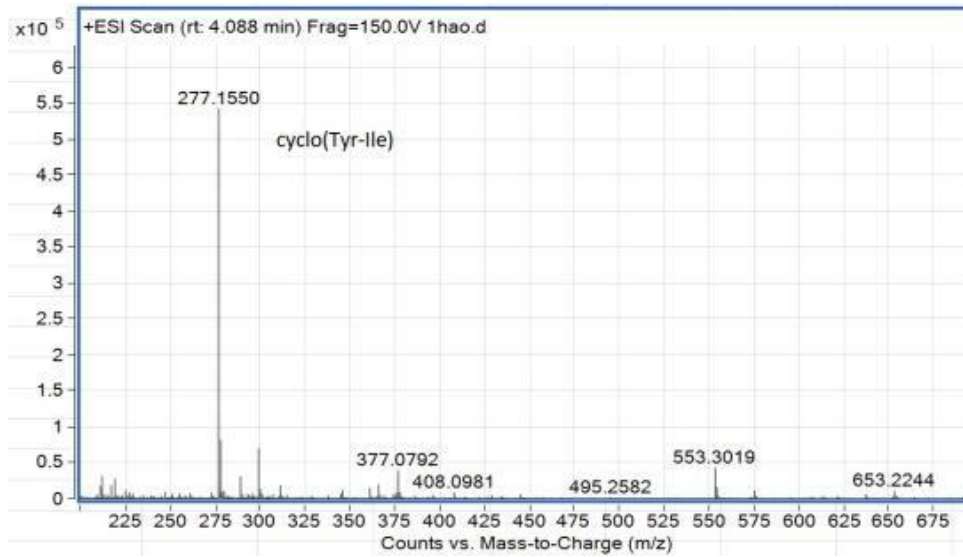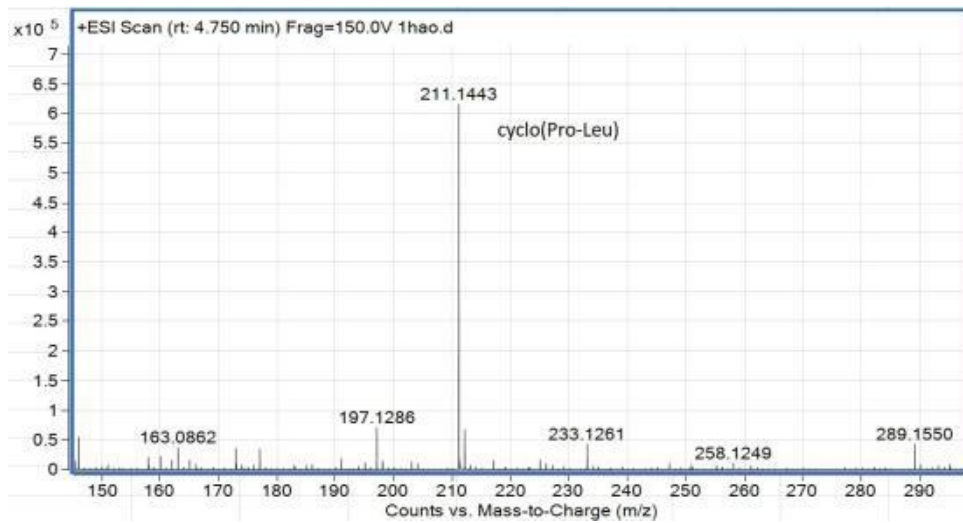

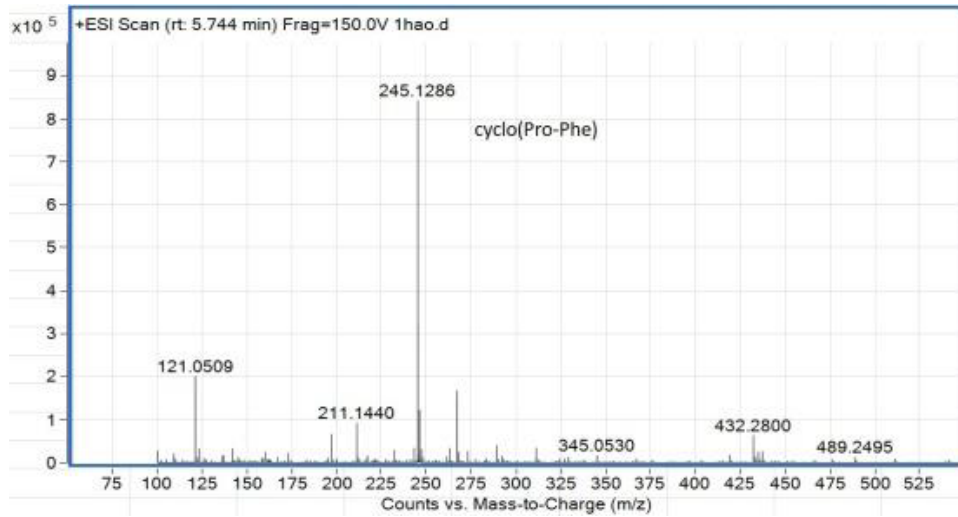

**Figure S5.** UPLC-MS spectra of fermentation broth extracts and identification of each compound.

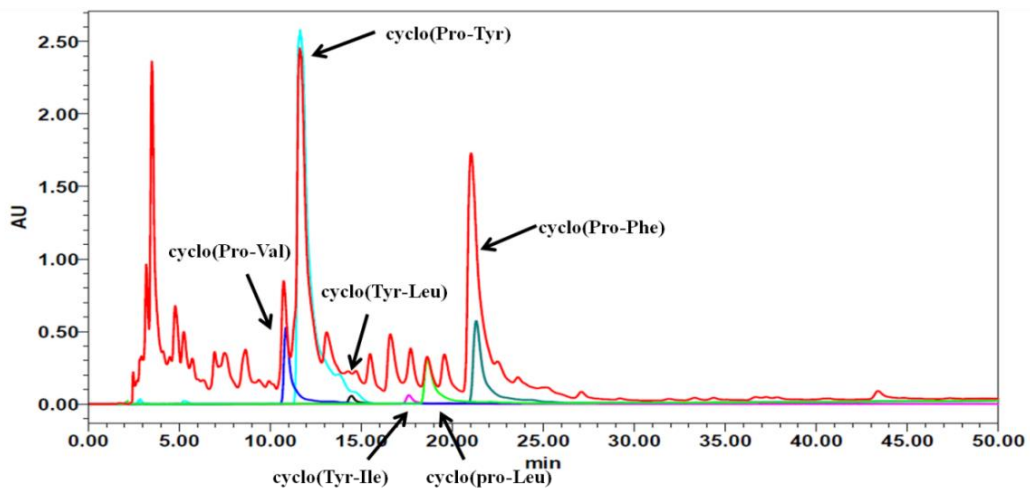

**Figure S6.** HPLC analysis of signaling molecules.

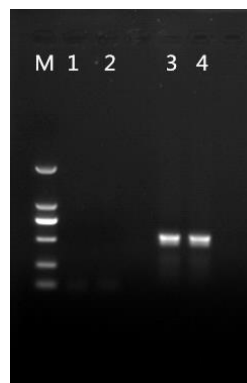

**Figure S7.** Agarose electrophoresis of the PCR-amplified NRPSs fragment. M: DNA marker DL2000; 1-2: blank control; 3-4: partial NRPSs gene fragment.

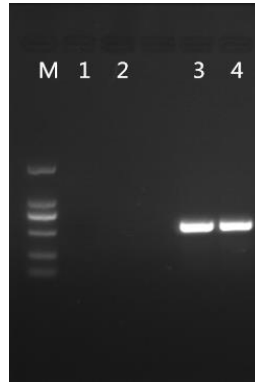

**Figure S8.** Agarose electrophoresis of PCR-amplified *NRPSs* fragment from the recombinant plasmid. M: DNA marker DL2000; 1-2: blank control; 3-4: partial *NRPSs* gene fragment.

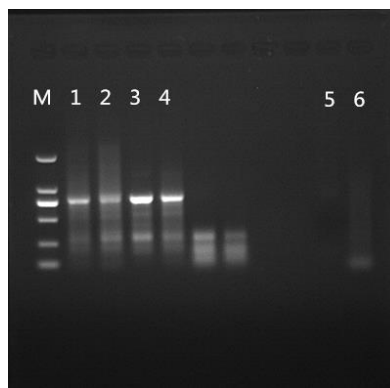

**Figure S9.** The identification of mutant using PCR. M: DNA marker DL2000; 1-4: Amplification of *NRPSs* fragment using genomic DNA of *Serratia odorifera* as template; 5-6: Amplification of *NRPSs* fragment using genomic DNA of *Serratia odorifera* mutant as template.
